# Supplementary material for: Effects of morphology, size and crystallinity on the electrochromic properties of nanostructured WO3 films
Source: Royal Society of Chemistry journal article supplement (doi:10.1039/c5ce00832h), 2015-01-01
Supplement: c5ce00832h1.pdf [file c5ce00832h1.pdf]

## Electronic Supplementary Information

### Effects of morphology, size and crystallinity on the electrochromic properties of nanostructured WO<sub>3</sub> films

Feng Zheng<sup>a,b,c</sup>, Wenkuan Man<sup>a</sup>, Min Guo<sup>\*a</sup>, Mei Zhang<sup>a</sup>, Qiang Zhen<sup>b,c</sup>

Fig. S1 shows Nyquist plots of WO<sub>3</sub> thin films with different morphologies and crystallinity. The EIS tests are carried out by applying an AC voltage of 10 mV in the frequency range of 100 kHz to 0.1 Hz at their bleached state<sup>1</sup>. A Randles circuit model is used to fit data presented in the inset of Fig. S1 at the lower right. The Randles circuit model comprises of series resistance ( $R_s$ ) of the system (resulting from electrolyte/substrate resistance), the charge transfer resistance ( $R_{ct}$ , i.e. interfacial redox reaction resistance) connected in parallel with an electrical double layer capacitance ( $C_{dl}$ ) at the electrolyte/electrode interface and finally the Warburg diffusion element ( $Z_w$ ) accounting from the ionic diffusion and charging of film<sup>2,3</sup>. The porous WO<sub>3</sub> nanofiber, WNRs-1 and annealed WNRs-1 reveal low magnitude of  $R_{ct}$  (244, 421, 211 $\Omega$ , respectively) than that of the WO<sub>3</sub> nanoflake arrays (2099  $\Omega$ ) and WNRs-2 (1693  $\Omega$ ), further confirming the fast charge transfer and Li<sup>+</sup> ion diffusion resulting in fast switching kinetics, which are in corresponding the optical modulation in Fig. 4.

---

<sup>a</sup> State Key Laboratory of Advanced Metallurgy, School of Metallurgical and Ecological Engineering, University of Science and Technology Beijing, Beijing 100083, P. R. China

<sup>b</sup> Materials Science and Engineering college, Shanghai University, Shanghai 200444, P. R. China

<sup>c</sup> Nano-science and Nano-technology Research Center, School of Materials Science and Engineering, Shanghai University, Shanghai 200444, P.R. China

\* E-mail: guomin@ustb.edu.cn, Fax: +86 10 62334926

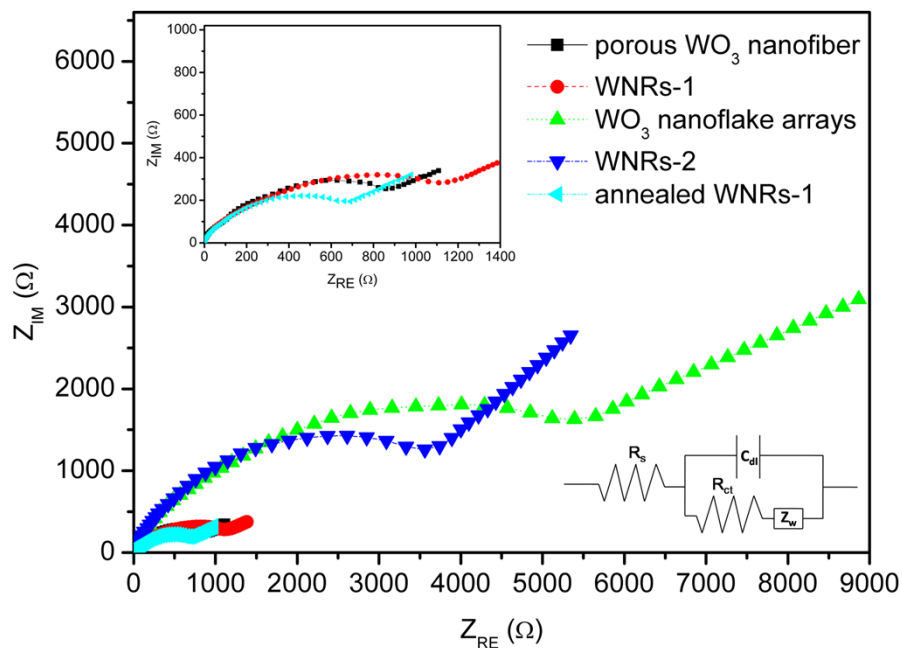

Fig. S1 EIS spectra of the as-prepared nanostructured WO<sub>3</sub> thin films.

## References

- 1 J. Zhang, J. Tu, X. Xia, X. Wang and C. Gu, *J. Mater. Chem.*, 2011, 21, 5492-5498.
- 2 V. V. Kondalkar, S. S. Mali, R. R. Kharade, K. V. Khot, P. B. Patil, R. M. Mane, S. Choudhury, P. S. Patil, C. K. Hong, J. H. Kim and P. N. Bhosale, *Dalton Trans.*, 2015, 44, 2788-2800.
- 3 V. V. Kondalkar, S. S. Mali, R. R. Kharade, R. M. Mane, P. S. Patil, C. K. Hong, J. H. Kim, S. Choudhury and P. N. Bhosale, *RSC Adv.*, 2015, 5, 26923-26931.
